# Supplementary material for: Genetic Diversity of Pseudomonas syringae pv. actinidiae: Seasonal and Spatial Population Dynamics
Source: MDPI journal article supplement (doi:10.3390/microorganisms8060931), 2020-06-20
Supplement: s1 [file s1]

**Table S3.** Total isolates and Psa strains recovered in this study.

| Orchard | Plant | Location   | Season | Nº Total Isolates | Nº Psa Isolates |
|---------|-------|------------|--------|-------------------|-----------------|
| A       | 1     | Epiphytic  | Spring | 18                | 12              |
| A       | 2     | Epiphytic  | Spring | 18                | 13              |
| A       | 3     | Epiphytic  | Spring | 24                | 21              |
| A       | 1     | Endophytic | Spring | 14                | 8               |
| A       | 2     | Endophytic | Spring | 11                | 10              |
| A       | 3     | Endophytic | Spring | 13                | 13              |
| A       | 1     | Epiphytic  | Autumn | 33                | 5               |
| A       | 2     | Epiphytic  | Autumn | 24                | 11              |
| A       | 3     | Epiphytic  | Autumn | 17                | 0               |
| A       | 1     | Endophytic | Autumn | 32                | 29              |
| A       | 2     | Endophytic | Autumn | 21                | 16              |
| A       | 3     | Endophytic | Autumn | 22                | 17              |
| B       | 1     | Epiphytic  | Spring | 21                | 17              |
| B       | 2     | Epiphytic  | Spring | 21                | 16              |
| B       | 3     | Epiphytic  | Spring | 22                | 15              |
| B       | 1     | Endophytic | Spring | 16                | 12              |
| B       | 2     | Endophytic | Spring | 22                | 15              |
| B       | 3     | Endophytic | Spring | 12                | 11              |
| B       | 1     | Epiphytic  | Autumn | 14                | 4               |
| B       | 2     | Epiphytic  | Autumn | 15                | 4               |
| B       | 3     | Epiphytic  | Autumn | 1                 | 0               |
| B       | 1     | Endophytic | Autumn | 19                | 17              |
| B       | 2     | Endophytic | Autumn | 21                | 11              |
| B       | 3     | Endophytic | Autumn | 19                | 8               |
| C       | 1     | Epiphytic  | Spring | 16                | 9               |
| C       | 2     | Epiphytic  | Spring | 21                | 15              |
| C       | 3     | Epiphytic  | Spring | 15                | 8               |
| C       | 1     | Endophytic | Spring | 23                | 19              |
| C       | 2     | Endophytic | Spring | 26                | 26              |
| C       | 3     | Endophytic | Spring | 27                | 21              |
| C       | 1     | Epiphytic  | Autumn | 19                | 7               |
| C       | 2     | Epiphytic  | Autumn | 25                | 21              |
| C       | 3     | Epiphytic  | Autumn | 11                | 0               |
| C       | 1     | Endophytic | Autumn | 24                | 17              |
| C       | 2     | Endophytic | Autumn | 33                | 25              |
| C       | 3     | Endophytic | Autumn | 23                | 23              |
| D       | 1     | Epiphytic  | Spring | 21                | 2               |
| D       | 2     | Epiphytic  | Spring | 21                | 3               |
| D       | 3     | Epiphytic  | Spring | 18                | 9               |
| D       | 1     | Endophytic | Spring | 26                | 22              |
| D       | 2     | Endophytic | Spring | 20                | 13              |
| D       | 3     | Endophytic | Spring | 32                | 23              |
| D       | 1     | Epiphytic  | Autumn | 5                 | 0               |
| D       | 2     | Epiphytic  | Autumn | 15                | 1               |
| D       | 3     | Epiphytic  | Autumn | 15                | 0               |
| D       | 1     | Endophytic | Autumn | 30                | 24              |
| D       | 2     | Endophytic | Autumn | 26                | 16              |
| D       | 3     | Endophytic | Autumn | 28                | 15              |
| Total   |       |            |        | 970               | 604             |
