# Supplementary material for: Genetic Diversity of Pseudomonas syringae pv. actinidiae: Seasonal and Spatial Population Dynamics
Source: MDPI journal article supplement (doi:10.3390/microorganisms8060931), 2020-06-20
Supplement: s1 [file s1]

**Table S2.** Reference strains used for the MLSA analysis.

| Strain     | Specie                                                       | Host                           | Isolation | Country                              | Locus tag   |             |             |             | Reference                                              |
|------------|--------------------------------------------------------------|--------------------------------|-----------|--------------------------------------|-------------|-------------|-------------|-------------|--------------------------------------------------------|
|            |                                                              |                                |           |                                      | <i>gapA</i> | <i>gltA</i> | <i>gyrB</i> | <i>rpoD</i> |                                                        |
| CFBP4909   | <i>Pseudomonas syringae</i> pv. <i>actinidiae</i> (Biovar 1) | <i>Actinidia deliciosa</i>     | 1984      | Japan (Shizuoka)                     | KF937408.1  | KF937505.1  | KF937602.1  | KF937699.1  | Takikawa <i>et al.</i> [5]; Ferrante & Scortichini [6] |
| ICMP19071  | <i>Pseudomonas syringae</i> pv. <i>actinidiae</i> (Biovar 2) | <i>Actinidia chinensis</i>     | 1997      | Korea (Jeonnam)                      | JN683487.1  | JN683506.1  | JN683468.1  | JN683411.1  | Koh <i>et al.</i> [16];, Chapman <i>et al.</i> [10]    |
| T10 04758  | <i>Pseudomonas syringae</i> pv. <i>actinidiae</i> (Biovar 3) | <i>Actinidia chinensis</i>     | 2010      | New Zealand (Te Puke, Bay of Plenty) | JN683474.1  | JN683493.1  | JN683455.1  | JN683398.1  | Chapman <i>et al.</i> [10]                             |
| CFBP7811   | <i>Pseudomonas syringae</i> pv. <i>actinidiae</i> (Biovar 3) | <i>Actinidia chinensis</i>     | 2010      | New Zealand (Hawke's Bay)            | KF937411.1  | KF937508.1  | KF937605.1  | KF937702.1  | Vanneste <i>et al.</i> [20]                            |
| CFBP7287   | <i>Pseudomonas syringae</i> pv. <i>actinidiae</i> (Biovar 3) | <i>Actinidia deliciosa</i>     | 2008      | Italy (Lazio)                        | KF937410.1  | KF937507.1  | KF937604.1  | KF937701.1  | Balestra <i>et al.</i> [1]                             |
| CFBP8047   | <i>Pseudomonas syringae</i> pv. <i>actinidiae</i> (Biovar 3) | <i>Actinidia deliciosa</i>     | 2010      | France (Rhône-Alpes)                 | KF937431.1  | KF937544.1  | KF937626.1  | KF937738.1  | Vanneste <i>et al.</i> (2011) [9]                      |
| MAFF212054 | <i>Pseudomonas syringae</i> pv. <i>actinidiae</i> (Biovar 5) | <i>Actinidia chinensis</i>     | 2012      | Japan (Saga)                         | AB842209.1  | AB842197.1  | AB842221.1  | AB842257.1  | Sawada, Miyoshi & Ide [61]                             |
| MAFF212056 | <i>Pseudomonas syringae</i> pv. <i>actinidiae</i> (Biovar 5) | <i>Actinidia chinensis</i>     | 2012      | Japan (Saga)                         | AB842211.1  | AB842199.1  | AB842223.1  | AB842259.1  | Sawada, Miyoshi & Ide [61]                             |
| MAFF212058 | <i>Pseudomonas syringae</i> pv. <i>actinidiae</i> (Biovar 5) | <i>Actinidia chinensis</i>     | 2012      | Japan (Saga)                         | AB842213.1  | AB842201.1  | AB842225.1  | AB842261.1  | Sawada, Miyoshi & Ide [61]                             |
| MAFF212061 | <i>Pseudomonas syringae</i> pv. <i>actinidiae</i> (Biovar 5) | <i>Actinidia chinensis</i>     | 2012      | Japan (Saga)                         | AB842216.1  | AB842204.1  | AB842228.1  | AB842264.1  | Sawada, Miyoshi & Ide [61]                             |
| MAFF212140 | <i>Pseudomonas syringae</i> pv. <i>actinidiae</i> (Biovar 6) | <i>Actinidia deliciosa</i>     | 2015      | Japan (Nagano)                       | LC065060.1  | LC065054.1  | LC065066.1  | LC065084.1  | Sawada <i>et al.</i> [12]                              |
| MAFF212130 | <i>Pseudomonas syringae</i> pv. <i>actinidiae</i> (Biovar 6) | <i>Actinidia deliciosa</i>     | 2015      | Japan (Nagano)                       | LC065055.1  | LC065049.1  | LC065061.1  | LC065079.1  | Sawada <i>et al.</i> [12]                              |
| MAFF212134 | <i>Pseudomonas syringae</i> pv. <i>actinidiae</i> (Biovar 6) | <i>Actinidia deliciosa</i>     | 2015      | Japan (Nagano)                       | LC065057.1  | LC065051.1  | LC065063.1  | LC065081.1  | Sawada <i>et al.</i> [12]                              |
| MAFF212138 | <i>Pseudomonas syringae</i> pv. <i>actinidiae</i> (Biovar 6) | <i>Actinidia deliciosa</i>     | 2015      | Japan (Nagano)                       | LC065059.1  | LC065053.1  | LC065065.1  | KF937738.1  | Sawada <i>et al.</i> [12]                              |
| CFBP7951   | <i>Pseudomonas syringae</i> pv. <i>actinidifoliorum</i>      | <i>Actinidia deliciosa</i>     | 2010      | New Zeland (Bay of Plenty Tauranga)  | KF937418.1  | KF937520.1  | KF937612.1  | KF937714.1  | Cunty <i>et al.</i> [21]                               |
| CFBP8041   | <i>Pseudomonas syringae</i> pv. <i>actinidifoliorum</i>      | <i>Actinidia deliciosa</i>     | 2011      | France (Pays de la Loire)            | KF937448.1  | KF937538.1  | KF937643.1  | KF937732.1  | Cunty <i>et al.</i> [21]                               |
| CFBP8043   | <i>Pseudomonas syringae</i> pv. <i>actinidifoliorum</i>      | <i>Actinidia deliciosa</i>     | 2011      | France (Pays de la Loire)            | KF937451.1  | KF937540.1  | KF937646.1  | KF937734.1  | Cunty <i>et al.</i> [21]                               |
| CFBP8045   | <i>Pseudomonas syringae</i> pv. <i>actinidifoliorum</i>      | <i>Actinidia chinensis</i>     | 1990      | Australia (Western Australia)        | KF937421.1  | KF937542.1  | KF937615.1  | KF937736.1  | Chapman <i>et al.</i> [10], Cunty <i>et al.</i> [21]   |
| CFBP2212   | <i>Pseudomonas syringae</i> pv. <i>tomato</i>                | <i>Lycopersicon esculentum</i> | 1960      | United Kingdom                       | KF937402.1  | KF937499.1  | JN190421.1  | JN185896.1  | Gardan <i>et al.</i> [51], Gironde & Manceau [52]      |
