# Supplementary material for: Genetic Diversity of Pseudomonas syringae pv. actinidiae: Seasonal and Spatial Population Dynamics
Source: MDPI journal article supplement (doi:10.3390/microorganisms8060931), 2020-06-20
Supplement: s1 [file s1]

Table S4. Origin of Psa strains isolated in this study, corresponding BOX PCR profile and relative abundance (%).

| Orchard | Plant | Location   | Season | Strain Designation                                                                                                                                                                                             | Box Profile | Relative abundance within orchard (%) |
|---------|-------|------------|--------|----------------------------------------------------------------------------------------------------------------------------------------------------------------------------------------------------------------|-------------|---------------------------------------|
| A       | 1     | Epiphytic  | Spring | KW81                                                                                                                                                                                                           | -           | 0,6                                   |
|         |       |            |        | KW83; KW84; KW85; KW86; KW89                                                                                                                                                                                   | 2           | 3,2                                   |
|         |       |            |        | KW97; KW133                                                                                                                                                                                                    | 3           | 1,3                                   |
|         |       |            |        | KW92; KW93; KW94; KW95                                                                                                                                                                                         | 8           | 2,6                                   |
| A       | 2     | Epiphytic  | Spring | KW342                                                                                                                                                                                                          | -           | 0,6                                   |
|         |       |            |        | KW101                                                                                                                                                                                                          | 5           | 0,6                                   |
|         |       |            |        | KW103; KW104; KW105; KW106; KW108; KW111; KW112; KW113                                                                                                                                                         | 9           | 5,2                                   |
|         |       |            |        | KW98; KW99; KW107                                                                                                                                                                                              | 36          | 1,9                                   |
| A       | 3     | Epiphytic  | Spring | KW55; KW56; KW59; KW60; KW62; KW64; KW343; KW344                                                                                                                                                               | -           | 5,2                                   |
|         |       |            |        | KW115                                                                                                                                                                                                          | 2           | 0,6                                   |
|         |       |            |        | KW67; KW68                                                                                                                                                                                                     | 4           | 1,3                                   |
|         |       |            |        | KW70                                                                                                                                                                                                           | 13          | 0,6                                   |
|         |       |            |        | KW54; KW57; KW58; KW65; KW69                                                                                                                                                                                   | 23          | 3,2                                   |
| A       | 1     | Endophytic | Spring | KW61; KW63; KW66; KW71                                                                                                                                                                                         | 24          | 2,6                                   |
|         |       |            |        | KW134                                                                                                                                                                                                          | -           | 0,6                                   |
|         |       |            |        | KW130; KW135                                                                                                                                                                                                   | 3           | 1,3                                   |
|         |       |            |        | KW131;KW132                                                                                                                                                                                                    | 2           | 1,3                                   |
|         |       |            |        | KW137                                                                                                                                                                                                          | 6           | 0,6                                   |
| A       | 2     | Endophytic | Spring | KW168; KW169                                                                                                                                                                                                   | 13          | 1,3                                   |
|         |       |            |        | KW140; KW141; KW142; KW143; KW146                                                                                                                                                                              | 9           | 3,2                                   |
|         |       |            |        | KW147; KW148; KW150                                                                                                                                                                                            | 10          | 1,9                                   |
| A       | 3     | Endophytic | Spring | KW145; KW149                                                                                                                                                                                                   | 36          | 1,3                                   |
|         |       |            |        | KW182                                                                                                                                                                                                          | -           | 0,6                                   |
|         |       |            |        | KW170; KW171; KW172; KW173; KW174; KW175; KW176; KW177; KW178; KW179; KW180; KW181                                                                                                                             | 10          | 7,7                                   |
| A       | 1     | Epiphytic  | Autumn | KW1586; KW1600; KW1646; KW1659                                                                                                                                                                                 | -           | 2,6                                   |
|         |       |            |        | KW1641                                                                                                                                                                                                         | 5           | 0,6                                   |
| A       | 2     | Epiphytic  | Autumn | KW1688                                                                                                                                                                                                         | -           | 0,6                                   |
|         |       |            |        | KW1427; KW1429; KW1431; KW1433; KW1465; KW1619; KW1620; KW1621; KW1622; KW1682                                                                                                                                 | 5           | 6,5                                   |
| A       | 3     | Epiphytic  | Autumn | -                                                                                                                                                                                                              | -           | 0,0                                   |
| A       | 1     | Endophytic | Autumn | KW1451; KW1452; KW1453                                                                                                                                                                                         | -           | 1,9                                   |
|         |       |            |        | KW1356; KW1357; KW1358; KW1359; KW1360; KW1361; KW1362; KW1363; KW1364; KW1365; KW1366; KW1552; KW1553; KW1554; KW1555; KW1556; KW1557; KW1558; KW1559; KW1560; KW1561; KW1562; KW1563; KW1564; KW1565; KW1599 | 5           | 16,8                                  |
|         |       |            |        | KW1488                                                                                                                                                                                                         | -           | 0,6                                   |
|         |       |            |        | KW1437; KW1440; KW1487; KW1489; KW1490; KW1491; KW1575; KW1576; KW1577; KW1579; KW1580; KW1581; KW1582; KW1680; KW1681                                                                                         | 5           | 9,7                                   |
| A       | 3     | Endophytic | Autumn | KW1445                                                                                                                                                                                                         | -           | 0,6                                   |
|         |       |            |        | KW1449; KW1480; KW1482; KW1483; KW1484; KW1485                                                                                                                                                                 | 6           | 3,9                                   |
|         |       |            |        | KW1447; KW1471; KW1472; KW1476; KW1477; KW1479; KW1481; KW1486; KW1583; KW1585                                                                                                                                 | 23          | 6,5                                   |
|         |       |            |        |                                                                                                                                                                                                                |             |                                       |
| B       | 1     | Epiphytic  | Spring | KW345                                                                                                                                                                                                          | -           | 0,8                                   |
|         |       |            |        | KW1; KW2; KW5; KW6; KW7; KW18                                                                                                                                                                                  | 5           | 4,6                                   |
|         |       |            |        | KW3; KW4; KW17                                                                                                                                                                                                 | 9           | 2,3                                   |
|         |       |            |        | KW8; KW9; KW10; KW11; KW12; KW13; KW14                                                                                                                                                                         | 36          | 5,4                                   |
| B       | 2     | Epiphytic  | Spring | KW80; KW121                                                                                                                                                                                                    | -           | 1,5                                   |
|         |       |            |        | KW76; KW122                                                                                                                                                                                                    | 5           | 1,5                                   |
|         |       |            |        | KW75; KW123; KW124; KW125; KW126; KW127                                                                                                                                                                        | 9           | 4,6                                   |
|         |       |            |        | KW74                                                                                                                                                                                                           | 27          | 0,8                                   |
| B       | 3     | Epiphytic  | Spring | KW73; KW77; KW78; KW79; KW128                                                                                                                                                                                  | 36          | 3,8                                   |
|         |       |            |        | KW129                                                                                                                                                                                                          | -           | 0,8                                   |
|         |       |            |        | KW154; KW156; KW157; KW158; KW159; KW160; KW161; KW165; KW167                                                                                                                                                  | 5           | 6,9                                   |
|         |       |            |        | KW155; KW162; KW166                                                                                                                                                                                            | 7           | 2,3                                   |
| B       | 1     | Endophytic | Spring | KW151; KW163                                                                                                                                                                                                   | 13          | 1,5                                   |
|         |       |            |        | KW302                                                                                                                                                                                                          | -           | 0,8                                   |
|         |       |            |        | KW22; KW23; KW26; KW27; KW28; KW29; KW30; KW31; KW32                                                                                                                                                           | 5           | 6,9                                   |
|         |       |            |        | KW24; KW25                                                                                                                                                                                                     | 36          | 1,5                                   |
| B       | 2     | Endophytic | Spring | KW49                                                                                                                                                                                                           | -           | 0,8                                   |
|         |       |            |        | KW42; KW43; KW45; KW50                                                                                                                                                                                         | 5           | 3,1                                   |
|         |       |            |        | KW183                                                                                                                                                                                                          | 7           | 0,8                                   |
|         |       |            |        | KW37; KW46; KW47; KW48; KW304                                                                                                                                                                                  | 9           | 3,8                                   |
| B       | 3     | Endophytic | Spring | KW38; KW39; KW40; KW44                                                                                                                                                                                         | 36          | 3,1                                   |
|         |       |            |        | KW184                                                                                                                                                                                                          | -           | 0,8                                   |
|         |       |            |        | KW195                                                                                                                                                                                                          | 5           | 0,8                                   |
|         |       |            |        | KW185; KW186; KW187; KW189; KW190; KW192; KW193; KW194                                                                                                                                                         | 7           | 6,2                                   |
| B       | 1     | Epiphytic  | Autumn | KW191                                                                                                                                                                                                          | 33          | 0,8                                   |
|         |       |            |        | KW1468                                                                                                                                                                                                         | -           | 0,8                                   |
| B       | 2     | Epiphytic  | Autumn | KW1413; KW1414; KW1667                                                                                                                                                                                         | 5           | 2,3                                   |
|         |       |            |        | KW1505                                                                                                                                                                                                         | -           | 0,8                                   |
|         |       |            |        | KW1500                                                                                                                                                                                                         | 5           | 0,8                                   |
|         |       |            |        | KW1507                                                                                                                                                                                                         | 13          | 0,8                                   |
| B       | 3     | Epiphytic  | Autumn | KW1493                                                                                                                                                                                                         | 27          | 0,8                                   |
|         |       |            |        | -                                                                                                                                                                                                              | -           | 0,0                                   |
| B       | 1     | Endophytic | Autumn | KW1411; KW1609                                                                                                                                                                                                 | -           | 1,5                                   |
|         |       |            |        | KW1412; KW1415; KW1473; KW1474; KW1475; KW1605; KW1607; KW1610; KW1611; KW1612; KW1613; KW1614; KW1616                                                                                                         | 5           | 10,0                                  |
|         |       |            |        | KW1606; KW1608                                                                                                                                                                                                 | 37          | 1,5                                   |
|         |       |            |        | KW1503; KW1504; KW1509; KW1510; KW1511; KW1512; KW1513                                                                                                                                                         | -           | 5,4                                   |
| B       | 2     | Endophytic | Autumn | KW1502; KW1514; KW1518; KW1519                                                                                                                                                                                 | 5           | 3,1                                   |
|         |       |            |        | KW1677; KW1678; KW1679; KW1694; KW1699; KW1716; KW1717                                                                                                                                                         | 5           | 5,4                                   |
| B       | 3     | Endophytic | Autumn | KW1618                                                                                                                                                                                                         | 7           | 0,8                                   |
|         |       |            |        |                                                                                                                                                                                                                |             |                                       |
| C       | 1     | Epiphytic  | Spring | KW528; KW529; KW530                                                                                                                                                                                            | -           | 1,6                                   |
|         |       |            |        | KW522; KW524; KW525; KW526; KW527; KW533                                                                                                                                                                       | 5           | 3,1                                   |
| C       | 2     | Epiphytic  | Spring | KW909                                                                                                                                                                                                          | -           | 0,5                                   |
|         |       |            |        | KW539; KW540; KW542; KW544; KW545; KW546; KW547; KW548; KW549; KW550; KW870                                                                                                                                    | 5           | 5,8                                   |
|         |       |            |        | KW543; KW864; KW887                                                                                                                                                                                            | 13          | 1,6                                   |
| C       | 3     | Epiphytic  | Spring | KW553; KW600                                                                                                                                                                                                   | 5           | 1,0                                   |
|         |       |            |        | KW867; KW868; KW869; KW903; KW904; KW905                                                                                                                                                                       | 36          | 3,1                                   |
| C       | 1     | Endophytic | Spring | KW391; KW382; KW383; KW384; KW385; KW386; KW387; KW388; KW389; KW390; KW391; KW472; KW863; KW902; KW914                                                                                                        | 5           | 7,9                                   |
|         |       |            |        | KW609; KW1239; KW1310; KW1332                                                                                                                                                                                  | 13          | 2,1                                   |
| C       | 2     | Endophytic | Spring | KW392; KW393; KW394; KW395; KW396; KW397; KW398; KW399; KW400; KW401; KW402; KW403; KW404; KW405; KW406; KW407; KW408; KW409                                                                                   | 5           | 9,4                                   |
|         |       |            |        | KW536; KW537                                                                                                                                                                                                   | 6           | 1,0                                   |
|         |       |            |        | KW410; KW538                                                                                                                                                                                                   | 13          | 1,0                                   |
|         |       |            |        | KW474; KW475; KW476; KW477                                                                                                                                                                                     | 36          | 2,1                                   |
| C       | 3     | Endophytic | Spring | KW425; KW427; KW428; KW429; KW430                                                                                                                                                                              | 5           | 2,6                                   |
|         |       |            |        | KW415; KW416; KW417; KW418; KW419; KW420; KW421; KW422; KW423; KW424; KW479; KW518; KW866; KW871; KW872; KW873                                                                                                 | 36          | 8,4                                   |
|         |       |            |        |                                                                                                                                                                                                                |             |                                       |
| C       | 1     | Epiphytic  | Autumn | KW1776; KW1930                                                                                                                                                                                                 | -           | 1,0                                   |
|         |       |            |        | KW1830                                                                                                                                                                                                         | 5           | 0,5                                   |
|         |       |            |        | KW1694; KW1771; KW1775; KW1993                                                                                                                                                                                 | 7           | 2,1                                   |
| C       | 2     | Epiphytic  | Autumn | KW1753; KW1754; KW1755; KW1756; KW1757; KW1763; KW1764; KW1765; KW1766; KW1767; KW1769; KW1773; KW1831; KW1832; KW1833; KW2044; KW2065; KW2066; KW2067; KW2068; KW2069                                         | 5           | 11,0                                  |
|         |       |            |        |                                                                                                                                                                                                                |             |                                       |
|         |       |            |        |                                                                                                                                                                                                                |             |                                       |
| C       | 3     | Epiphytic  | Autumn | -                                                                                                                                                                                                              | -           | 0,0                                   |
| C       | 1     | Endophytic | Autumn | KW1741; KW1748; KW2053; KW2054                                                                                                                                                                                 | -           | 2,1                                   |
|         |       |            |        | KW1744; KW1745; KW1746; KW1747; KW1780; KW1781; KW1782; KW1783; KW2055; KW2056; KW2057; KW2058; KW2075                                                                                                         | 5           | 6,8                                   |
| C       | 2     | Endophytic | Autumn | KW1759; KW2042; KW2094                                                                                                                                                                                         | -           | 1,6                                   |
|         |       |            |        | KW1760; KW1761; KW1803; KW1804; KW1805; KW1812; KW1813; KW1858; KW1859; KW1860; KW1863; KW1864; KW1977; KW1978; KW2012; KW2040; KW2041; KW2079; KW2092; KW2093; KW2095                                         | 5           | 11,0                                  |
|         |       |            |        | KW1762                                                                                                                                                                                                         | 7           | 0,5                                   |
|         |       |            |        |                                                                                                                                                                                                                |             |                                       |
| C       | 3     | Endophytic | Autumn | KW1777; KW1778; KW1779; KW1814; KW1815; KW1816; KW1817; KW1819; KW1820; KW1821; KW1822; KW1823; KW1825; KW1826; KW1827; KW1828; KW1829; KW2013; KW2071; KW2076; KW2096                                         | 5           | 11,0                                  |
|         |       |            |        | KW1818; KW1824                                                                                                                                                                                                 | 6           | 1,0                                   |
|         |       |            |        |                                                                                                                                                                                                                |             |                                       |
| D       | 1     | Epiphytic  | Spring | KW1152                                                                                                                                                                                                         | 13          | 0,8                                   |
|         |       |            |        | KW517                                                                                                                                                                                                          | 33          | 0,8                                   |
| D       | 2     | Epiphytic  | Spring | KW850                                                                                                                                                                                                          | 5           | 0,8                                   |
|         |       |            |        | KW779; KW780                                                                                                                                                                                                   | 36          | 1,6                                   |
| D       | 3     | Epiphytic  | Spring | KW840; KW841; KW842; KW843; KW844; KW857; KW858; KW1081                                                                                                                                                        | 5           | 6,3                                   |
|         |       |            |        | KW1215                                                                                                                                                                                                         | 13          | 0,8                                   |
| D       | 1     | Endophytic | Spring | KW616                                                                                                                                                                                                          | -           | 0,0                                   |
|         |       |            |        | KW502; KW505; KW506; KW507; KW508; KW510; KW511; KW512; KW513; KW515; KW516; KW519; KW520; KW521; KW555; KW556; KW754                                                                                          | 13          | 13,3                                  |
|         |       |            |        | KW503; KW504; KW509; KW514; KW518                                                                                                                                                                              | 33          | 3,9                                   |
|         |       |            |        | KW765; KW766                                                                                                                                                                                                   | -           | 1,6                                   |
| D       | 2     | Endophytic | Spring | KW769; KW783; KW1013; KW1150                                                                                                                                                                                   | 5           | 3,1                                   |
|         |       |            |        | KW771; KW772; KW773; KW774; KW777; KW778; KW781                                                                                                                                                                | 36          | 5,5                                   |
| D       | 3     | Endophytic | Spring | KW802; KW803; KW804; KW805; KW806; KW807; KW808; KW809; KW811; KW812; KW813; KW815; KW816; KW817; KW853; KW854; KW855; KW856; KW894; KW895; KW1022                                                             | 5           | 16,4                                  |
|         |       |            |        | KW1214; KW1216                                                                                                                                                                                                 | 13          | 1,6                                   |
|         |       |            |        |                                                                                                                                                                                                                |             |                                       |
| D       | 1     | Epiphytic  | Autumn | -                                                                                                                                                                                                              | -           | 0,0                                   |
| D       | 2     | Epiphytic  | Autumn | KW1983                                                                                                                                                                                                         | 5           | 0,8                                   |
| D       | 3     | Epiphytic  | Autumn | -                                                                                                                                                                                                              | -           | 0,0                                   |
| D       | 1     | Endophytic | Autumn | KW1784; KW1786; KW1806; KW1807; KW1808; KW1809; KW1810; KW1839; KW1840; KW1841; KW1853; KW1854; KW1855; KW1856; KW1861; KW1862; KW1862; KW2011; KW2064; KW2080; KW2081; KW2082; KW2083; KW2106                 | 5           | 18,8                                  |
|         |       |            |        |                                                                                                                                                                                                                |             |                                       |
|         |       |            |        |                                                                                                                                                                                                                |             |                                       |
| D       | 2     | Endophytic | Autumn | KW1787; KW1788; KW1789; KW1886; KW1887; KW1888; KW1894; KW1895; KW1896; KW1897; KW1898; KW1899; KW1906; KW2062; KW2063; KW2084                                                                                 | 5           | 12,5                                  |
|         |       |            |        |                                                                                                                                                                                                                |             |                                       |
| D       | 3     | Endophytic | Autumn | KW1871; KW1872; KW1959; KW1960; KW1967; KW2059; KW2060; KW2061; KW2077; KW2078; KW2085; KW2086; KW2089; KW2119; KW2120                                                                                         | 5           | 11,7                                  |
|         |       |            |        |                                                                                                                                                                                                                |             |                                       |
