# Supplementary material for: Genetic Diversity of Pseudomonas syringae pv. actinidiae: Seasonal and Spatial Population Dynamics
Source: MDPI journal article supplement (doi:10.3390/microorganisms8060931), 2020-06-20
Supplement: s1 [file s1]

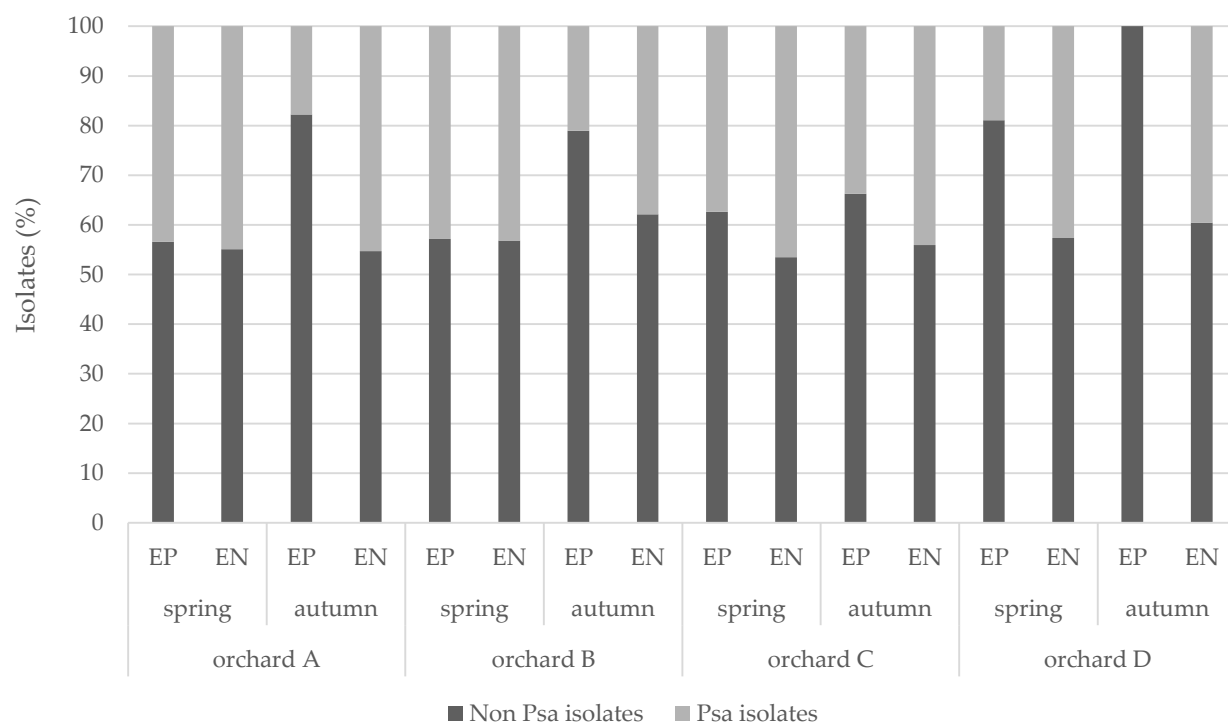

**Figure S2.** Percentage of total isolates and Psa strains recovered from four kiwi orchards (A to D). EP: epiphytic isolates; EN: endophytic isolates. Average value of the total number of isolates obtained from three representative plants sampled in each orchard per condition.
