# Supplementary material for: Genetic Diversity of Pseudomonas syringae pv. actinidiae: Seasonal and Spatial Population Dynamics
Source: MDPI journal article supplement (doi:10.3390/microorganisms8060931), 2020-06-20
Supplement: s1 [file s1]

**Table S1.** Primers used for Psa identification, molecular typing and characterization.

| Test          | ID | Primer               | Amplified gene/region | Size (bp) | Primer Sequence (5'-3')                                    | References                   |
|---------------|----|----------------------|-----------------------|-----------|------------------------------------------------------------|------------------------------|
| Duplex-PCR    |    | KN-F                 | Genomic DNA fragment  | 492       | CACGATACATGGGCTTATGC                                       | Koh & Nou [42]               |
|               |    | KN-R                 |                       |           | CTTTTCATCCACACACTCCG                                       |                              |
|               |    | AvrDdpx-F            | <i>avrD1</i>          | 230       | TTTCGGTGGTAACGTTGGCA                                       | Galleli <i>et al.</i> [43]   |
|               |    | AvrDdpx-R            |                       |           | TTCCGCTAGGTGAAAAATGGG                                      |                              |
| BOX-PCR       |    | BOXA1R               | BOX element           | -         | CTACGGCAAGGCGACGCTGACG                                     | Louws <i>et al.</i> [31]     |
| Multiplex-PCR | A  | Psa F                | <i>hopZ3</i>          | 311       | CAGAGGCGCTAACGAGGAAA                                       | Balestra <i>et al.</i> [44]  |
|               |    | Psa R                |                       |           | CGAGCATACATCAACAGGTCA                                      |                              |
|               | B  | Europe F             | PPHGI-1               | 733       | TGGTGATCGTCTGGATGTGT                                       |                              |
|               |    | Europe R             |                       |           | ATTATGCTCCTGGCTCATGG                                       |                              |
|               | C  | J/K F                | PPHGI-1               | 254       | AGCAACGGTGGTTTGTTC                                         |                              |
|               |    | J/K R                |                       |           | AAATGTTTGCCAGCCAAGTC                                       |                              |
|               | D  | China F              | PPHGI-1               | 609       | GGAGTTCAGCAACTGACG                                         |                              |
|               |    | China R              |                       |           | CGCTCAAGATCCTTTTCCAT                                       |                              |
| Phaseolotoxin | E  | ArgKF3<br>ArgKR      | <i>tox-argK</i>       | 800       | TCCCCCGGGAGGAAATTCATGAAGATTA<br>AACTGCAGTCAGGGGACGACTGTCTC | Templeton <i>et al.</i> [46] |
| Coronatine    | F  | CFLF<br>CFLR         | <i>cfl</i>            | 650       | GGCGCTCCCTCGCACTT<br>GGTATTGGCGGGGGTGC                     | Bereswill <i>et al.</i> [45] |
| MLST          |    | gapA-Fps<br>gapA-Rps | <i>gapA</i>           | 675       | CGCCATYCGCAACCCG<br>CCCAYTCGTTGTCGTACCA                    | Sarkar & Guttman [47]        |
|               |    | gltA-Fp<br>gltA-Rp   |                       |           | AGTTGATCATCGAGGGCGCWGCC<br>TGATCGGTTTGATCTCGCACGG          |                              |
|               |    | gltA-Fs<br>gltA-Rs   |                       | 995       | CCCGTCGAGCTGCCAATWCTGA<br>ATCTCGCACGSGTRTTGAACATC          |                              |
|               |    | gyrB-Fps<br>gyrB-Rps |                       |           | MGGCGGYAAGTTTCGATGACAAYTC<br>TRATBKAGTCARACCTTCRCGSGC      |                              |
|               |    | rpoD-Fp<br>rpoD-Fs   | <i>rpoD</i>           | 812       | AAGGCGARATCGAAATCGCCAAGCG<br>GGAACWKGCAGGAAGTCGGCACG       |                              |
|               |    | rpoD-Rps             |                       |           | AAGCGTATCGAAGAAGGCATYCGTG                                  |                              |
|               |    |                      |                       |           |                                                            |                              |
|               |    |                      |                       |           |                                                            |                              |
|               |    |                      |                       |           |                                                            |                              |
|               |    |                      |                       |           |                                                            |                              |
