# Supplementary material for: Genetic Diversity of Pseudomonas syringae pv. actinidiae: Seasonal and Spatial Population Dynamics
Source: MDPI journal article supplement (doi:10.3390/microorganisms8060931), 2020-06-20
Supplement: s1 [file s1]

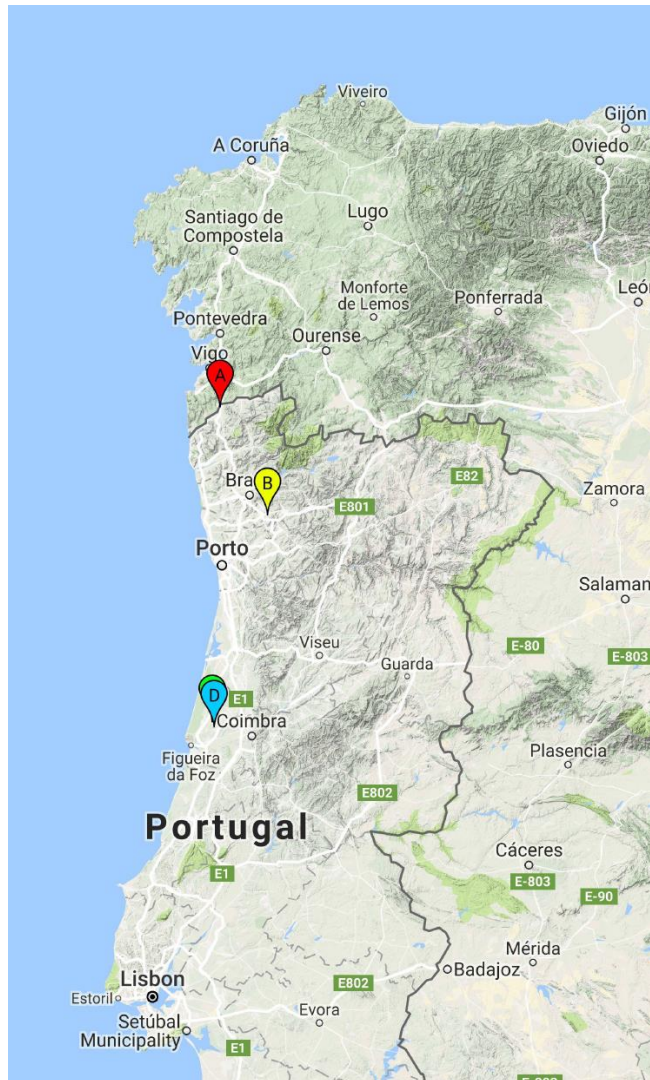

**Figure S1.** Geographical localization of the four selected kiwifruit orchards in Portugal. A, Valença do Minho (Viana do Castelo); B, São Esteves de Briteiros (Guimarães); C, Catarruchos (Coimbra); D, Cabeça-Alta (Coimbra). Source: <https://www.google.pt/maps>. Orchards A and B were 70 km away, while orchards D and E distanced by 4 km from each other. The central region orchards are at a distance of 190 km and 120 km from orchard A and B, respectively.
